# Supplementary material for: Strain glass analogue in a bent-core liquid crystal exhibiting the dark conglomerate phase
Source: Royal Society of Chemistry journal article supplement (doi:10.1039/c2sm25664a), 2012-01-01
Supplement: c2sm25664a.pdf [file c2sm25664a.pdf]

This compound was synthesized following a procedure described in the literature [1] using 4-*n*-undecyloxy 3-methylbenzoic acid instead of 4-*n*-undecyloxy 3-fluorobenzoic acid.

**2,7-Naphthylene bis(4-(4-*n*-undecyloxybenzoyloxy) 3-methylbenzoate)**

Yield: (80%); mp 122.5 °C; IR (KBr)  $\nu_{\text{max}}$ : 3074, 2955, 2918, 2868, 2848, 2739, 2646, 1735, 1730, 1627, 1604, 1504, 1469, 1460, 1431, 1371  $\text{cm}^{-1}$ ;  $^1\text{H}$  NMR (400 MHz,  $\text{CDCl}_3$ )  $\delta$ : 8.33 (d,  $J = 8.69$  Hz, 4H, Ar-H), 8.05 (d,  $J = 8.37$  Hz, 2H, Ar-H), 8.0 (d,  $J = 2$  Hz, 2H, Ar-H), 7.95 (d,  $J = 8.8$  Hz, 2H, Ar-H), 7.70 (d,  $J = 2$  Hz, 2H, Ar-H), 7.39 (d,  $J = 8.64$  Hz, 6H, Ar-H), 6.90 (d,  $J = 8.76$  Hz, 2H, Ar-H), 4.07 (t,  $J = 6.4$  Hz, 4H,  $2 \times \text{Ar-O-CH}_2$ -), 2.29 (s, 6H,  $2 \times \text{-Ar-CH}_3$ ), 1.88-1.82 (quin,  $J = 7.02$  Hz, 4H,  $2 \times \text{Ar-O-CH}_2\text{-CH}_2$ -), 1.55-1.27 (m, 32H,  $2 \times \text{-(CH}_2\text{)}_8$ -), 0.88 (t,  $J = 6.42$  Hz, 6H,  $2 \times \text{-CH}_3$ ); Elemental analysis:  $\text{C}_{62}\text{H}_{72}\text{O}_{10}$  requires C 76.20, H 7.42; found C 76.59, H 7.18%.

Reference

- [1] R. Amaranatha reddy, V. A. Raghunathan and B. K. Sadashiva, *Chem. Mater.* **2005**, *17*, 274-283.
